# Supplementary material for: Effectiveness of integrated care for older adults with depression and hypertension in rural China: A cluster randomized controlled trial
Source: PLoS Med. 2022 Oct 24;19(10):e1004019. doi: 10.1371/journal.pmed.1004019 (PMC9639850; doi:10.1371/journal.pmed.1004019)
Supplement: S2 Appendix — (DOC) [file pmed.1004019.s008.doc]

CONSORT 2010 checklist for reporting a randomised trial

Title: Chinese Older Adult Collaborations in Health (COACH) Study

| Section/Topic | Item No | Checklist item | Reported in section - subsection, paragraph number |
| --- | --- | --- | --- |
| Title and abstract | | | |
|  | 1a | Identification as a randomised trial in the title | Title page |
| 1b | Structured summary of trial design, methods, results, and conclusions | Abstract |
| Introduction | | | |
| Background and objectives | 2a | Scientific background and explanation of rationale | Intro, paragraphs 1, 2, 3 |
| 2b | Specific objectives or hypotheses | Intro, para 4 |
| Methods | | | |
| Trial design | 3a | Description of trial design (such as parallel, factorial) including allocation ratio | Methods - Study Design, para 1 |
| 3b | Important changes to methods after trial commencement (such as eligibility criteria), with reasons | None |
| Participants | 4a | Eligibility criteria for participants | Methods – Participants, para 1 |
| 4b | Settings and locations where the data were collected | Methods – Assessment, para 1 |
| Interventions | 5 | The interventions for each group with sufficient details to allow replication, including how and when they were actually administered | Refer to TIDieR checklist (included) |
| Outcomes | 6a | Completely defined pre-specified primary and secondary outcome measures, including how and when they were assessed | Methods – Assessment, para 2, 3 |
| 6b | Any changes to trial outcomes after the trial commenced, with reasons | None |
| Sample size | 7a | How sample size was determined | Methods – Statistical analysis, para 1 |
| 7b | When applicable, explanation of any interim analyses and stopping guidelines | Not applicable |
| Randomisation: |  |  |  |
| Sequence generation | 8a | Method used to generate the random allocation sequence | Methods – Randomization and masking, para 1 |
| 8b | Type of randomisation; details of any restriction (such as blocking and block size) | Methods – Randomization and masking, para 1 |
| Allocation concealment mechanism | 9 | Mechanism used to implement the random allocation sequence (such as sequentially numbered containers), describing any steps taken to conceal the sequence until interventions were assigned | Methods – Randomization and masking, para 1 |
| Implementation | 10 | Who generated the random allocation sequence, who enrolled participants, and who assigned participants to interventions | Methods – Randomization and masking, para 1 |
| Blinding | 11a | If done, who was blinded after assignment to interventions (for example, participants, care providers, those assessing outcomes) and how | Methods – Randomization and masking, para 2 |
| 11b | If relevant, description of the similarity of interventions | Not applicable |
| Statistical methods | 12a | Statistical methods used to compare groups for primary and secondary outcomes | Methods – Statistical analysis, para 2, 3, 4 |
| 12b | Methods for additional analyses, such as subgroup analyses and adjusted analyses | Methods – Statistical analysis, para 5 |
| Results | | | |
| Participant flow (a diagram is strongly recommended) | 13a | For each group, the numbers of participants who were randomly assigned, received intended treatment, and were analysed for the primary outcome | Results, para 1  Results, para 2 (Figure 1) |
| 13b | For each group, losses and exclusions after randomisation, together with reasons | Methods – Randomization and masking, para 1 |
| Recruitment | 14a | Dates defining the periods of recruitment and follow-up | Results, para 1 |
| 14b | Why the trial ended or was stopped | Ended as planned 12 months after last recruitment wave |
| Baseline data | 15 | A table showing baseline demographic and clinical characteristics for each group | Results, para 3 (Table 1) |
| Numbers analysed | 16 | For each group, number of participants (denominator) included in each analysis and whether the analysis was by original assigned groups | Results, para 3 (Table 1) |
| Outcomes and estimation | 17a | For each primary and secondary outcome, results for each group, and the estimated effect size and its precision (such as 95% confidence interval) | Results, para 5 & 6 Results, para 8 (Table 2) |
| 17b | For binary outcomes, presentation of both absolute and relative effect sizes is recommended | -- |
| Ancillary analyses | 18 | Results of any other analyses performed, including subgroup analyses and adjusted analyses, distinguishing pre-specified from exploratory | Results, para 9, 10  Results, para 11 (Figure 2)  Results, para 12 (Figure 3) |
| Harms | 19 | All important harms or unintended effects in each group (for specific guidance see CONSORT for harms) | Results, para 7 |
| Discussion | | | |
| Limitations | 20 | Trial limitations, addressing sources of potential bias, imprecision, and, if relevant, multiplicity of analyses | Discussion, para 4, 5, 6, 7 |
| Generalisability | 21 | Generalisability (external validity, applicability) of the trial findings | Discussion, para 6 |
| Interpretation | 22 | Interpretation consistent with results, balancing benefits and harms, and considering other relevant evidence | Discussion, para 2 |
| Other information | | | Abstract, para 2 |
| Registration | 23 | Registration number and name of trial registry |
| Protocol | 24 | Where the full trial protocol can be accessed, if available | <https://clinicaltrials.gov/ct2/show/NCT01938963> |
| Funding | 25 | Sources of funding and other support (such as supply of drugs), role of funders | Financial disclosure statement |
